# Neural knowledge assembly in humans and deep networks

Stephanie Nelli<sup>1,2</sup>, Lukas Braun<sup>1</sup>, Tsvetomira Dumbalska<sup>1</sup>, Andrew Saxe<sup>1,3,4</sup>, Christopher Summerfield<sup>1</sup>

Affiliations:

<sup>1</sup> Department of Experimental Psychology, University of Oxford, Oxford, United Kingdom

<sup>2</sup> Department of Cognitive Science, Occidental College, Los Angeles California, United States

<sup>3</sup> Gatsby Unit & Sainsbury Wellcome Centre, University College London, London, United Kingdom

<sup>4</sup> CIFAR Azrieli Global Scholars program, CIFAR, Toronto, Canada

Correspondence to [nelli@oxy.edu](mailto:nelli@oxy.edu) or [christopher.summerfield@psy.ox.ac.uk](mailto:christopher.summerfield@psy.ox.ac.uk)

## Abstract (122 words)

Human understanding of the world can change rapidly when new information comes to light, such as when a plot twist occurs in a work of fiction. This flexible “knowledge assembly” requires few-shot reorganisation of neural codes for relations among objects and events. However, existing computational theories are largely silent about how this could occur. Here, participants learned a transitive ordering among novel objects within two distinct contexts, before exposure to new knowledge revealing how the contexts were linked. BOLD signals in dorsal frontoparietal cortical areas revealed that objects were rapidly and dramatically rearranged on the neural manifold after minimal exposure to the linking information. We then adapt stochastic online gradient descent to permit similar rapid knowledge assembly in a neural network model.

## Introduction

To make sense of the world, we need to know how objects, people and places relate to one another. Understanding how relational knowledge is acquired, organised and used for inference has become a frontier topic in both neuroscience and machine learning research [1–7]. Since Tolman, neuroscientists have proposed that when ensembles of states are repeatedly co-experienced, they are mentally organised into cognitive maps whose geometry mirrors the external environment [8–12]. On a neural level, the associative distance between objects or locations (i.e. how related they are in space or time), has been found to covary with similarity (or dissimilarity) among neural coding patterns. Some neural signals, such as in medial temporal lobe structures, may even explicitly encode relational information about how space is structured or how knowledge hierarchies are organised [13–15].

A striking aspect of cognition is that these knowledge structures can be rapidly reconfigured when new information becomes available. For example, a plot twist in a film might require the viewer to dramatically reconsider a protagonist’s motives, or an etymological insight might allow a reader to suddenly understand the connection between two words. Here, we dub this process “knowledge assembly” because it requires existing knowledge to be rapidly (re-)assembled on the basis of minimal new information. How do brains update knowledge structures; selectively modifying certain relations while keeping others in tact? In machine learning research [16,17], solutions to the general problem of building rich conceptual knowledge structures include graph-based architectures [18], modular networks [19], probabilistic programs [20], and deep generative models [21]. However, whilst these artificial tools can allow for expressive mental representation or powerful inference, they tend to learn slowly and require dense supervision, making them implausible models of knowledge assembly and limiting their scope as theories of biological learning.

How, then, does knowledge assembly occur in humans? We designed a task in which human participants learned the rank of adjacent items within two ordered sets of novel objects occurring in distinct temporal contexts. Participants acquired and generalised the transitive relations both within and between contexts, and did so in a fashion qualitatively identical to a

feedforward neural network trained to do a similar task. The geometry of multivoxel BOLD signals recorded from dorsal stream structures suggested that humans solved the task by representing objects on two parallel mental lines, one for each context, building on previous findings [22–25]. This coding strategy mirrored that observed in the hidden layer of the neural network. We then provided a very small number of ‘list linking’ training examples meant to imply that the two ordered sets in fact lay on a single continuum. Our participants rapidly inferred the full set of resulting transitive relations given this minimal (and potentially ambiguous) information, as found previously in humans [26] and macaques [27]. We observed remarkable few-shot adjustments in neural geometries consequent from the new information, as human BOLD signals were recorded both before and after this brief training period. We then describe a theory of how knowledge can be rapidly assembled using a version of the artificial neural network model to a computational account of the behavioural and neural results observed in humans.

## Results

Human participants ( $n = 34$ ) performed a computerised task that involved making decisions about novel visual objects. Each object  $i$  was randomly assigned a ground truth rank ( $i_1 - i_{12}$ ) on the nonsense dimension of “brispyness” (**Fig. 1A**; see Methods; where  $i_1$  is the most brispy and  $i_{12}$  is the least). During initial training (train\_short), the 12 objects were split into two distinct sets (items  $i_1 - i_6$  and  $i_7 - i_{12}$ ) and presented in alternating blocks (contexts; see Methods). Within each context, participants were asked to indicate with a button press which of two objects with adjacent rank (e.g.  $i_3$  and  $i_4$ ) was more (or less) “brispy”, receiving fully informative feedback (**Fig. 1B**, upper panel). Note that this training regime allowed participants to infer ranks within a set (i.e. within  $i_1 - i_6$  or  $i_7 - i_{12}$ ) but betrayed no information about the ground truth relation between the two sets (e.g.  $i_2 < i_9$ ). Participants were trained on adjacent relations to a predetermined criterion, with final training accuracy reaching  $95.6 \pm 2.9$  % (mean  $\pm$  SD; **Fig. 1C**; see Methods). The use of novel objects [28] and a nonword label was designed to minimise participants’ tendency to use prior information when solving the task.

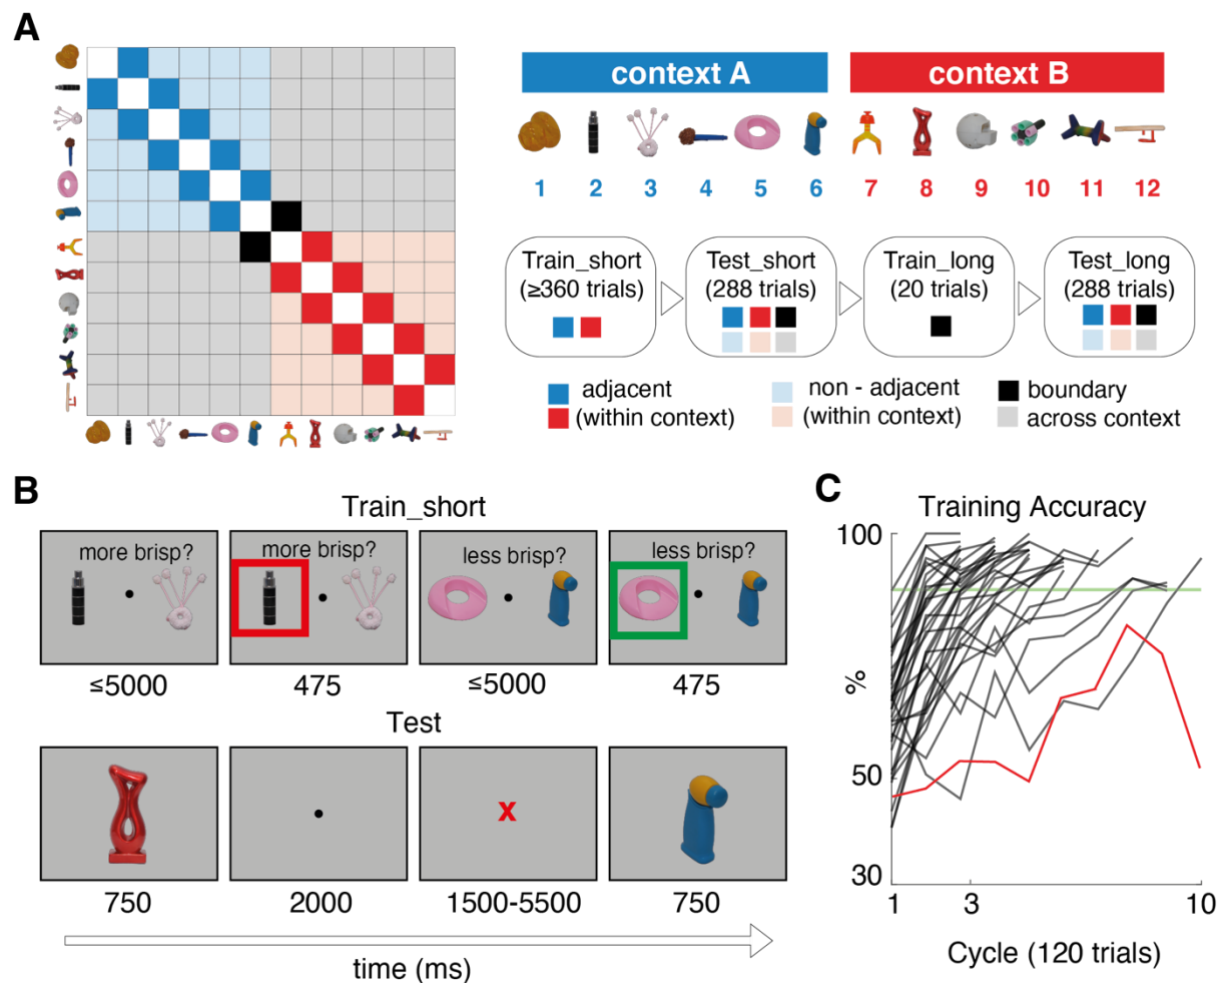

**Figure 1. Task and design.** **A.** Left: matrix illustrating training and testing conditions for an example set of objects ordered by rank (on x and y axes). Each entry indicates a pair of stimuli defined by their row and column. Colours signal when the pair was trained or tested. For example, dark blue and red squares are within-context pairs, shown during train\_short. In addition to these, lighter blue and red squares (trained non-adjacent) and grey (untrained) are pairs tested during test\_short. The black squares are the pairs shown during boundary training (train\_long). Right: schematic of experimental sequence and legend. Although we use the same set of objects for display purposes, note that each participant viewed a randomly sampled set of novel objects **B.** Example trial sequence during training (upper) and test (lower). Numbers below each example screen show the frame duration in ms. Timings for test were chosen to assist with BOLD modelling. **C.** Percentage accuracy over blocks during training for each individual. Stopping criterion is shown as a green line. The excluded participant is shown as a red trace. A training “cycle” consists of two blocks (one for each set of items). More details are provided in the Online Methods.

After training, participants entered the scanner and performed a first test phase [test\_short] in which they viewed objects one by one that were sampled randomly from across the full range ( $i_1 - i_{12}$ ; see Methods). Participants were asked to report the “brisiness” of each object relative to its predecessor with a button press (a 1-back task; **Fig. 1B**, lower panel). Therefore, the test phase involved comparisons of trained (adjacent) pairs within context (e.g.  $i_3$  and  $i_4$ ), untrained (non-adjacent) pairs within context (e.g.  $i_3$  and  $i_6$ ) as well as untrained pairs across

contexts (e.g.  $i_3$  and  $i_{10}$ ). Importantly, participants did not receive trialwise feedback on their choices during the test phase (see Methods).

Our first question was whether humans generalised knowledge about object *brispiness* both within and between contexts during the test\_short phase. We collapse across the two contexts as there was no difference in either reaction times (RT) or accuracy between them (paired t-tests between contexts - Accuracy:  $t_{33} = 0.08$ ,  $p = 0.94$ ; RT:  $t_{33} = 0.42$ ,  $p = 0.67$ ). Participants performed above chance both on adjacent pairs on which they had been trained (e.g.  $i_3$  and  $i_4$  or  $i_9$  and  $i_{10}$ ) [mean accuracy =  $86.0 \pm 10.4$ , t-test against 50%,  $t_{33} = 20.5$ ,  $p < 0.001$ ] but also on untrained, nonadjacent pairs for which transitive inference was required (**Fig. 2A**) (e.g.  $i_3$  and  $i_6$  or  $i_7$  and  $i_{10}$ ) [mean accuracy  $96.7 \pm 19.2$ ,  $t_{33} = 83.7$ ,  $p < 0.001$ ]. In fact, they were faster and more accurate for comparisons between non-adjacent (untrained) than adjacent (trained) items (**Fig. 2B**) [accuracy:  $t_{33} = 7.8$ ,  $p < 0.001$ ; RT:  $t_{33} = 11.7$ ,  $p < 0.001$ ]. This was part of a larger trend of increasing accuracy (and decreasing RT) with growing distance between comparanda (**Fig. 2A-B**, right panels) [accuracy:  $\beta = 3.4\%$  per rank;  $t_{33} = 7.7$ ,  $p < 0.001$ . RT: = 72 ms faster per rank;  $t_{33} = -7.8$ ,  $p < 0.001$ ;  $\beta$ s obtained with a regression model], known as the “symbolic distance” effect [26,29]. We note that this result is not readily explained by models of transitive inference based on spreading activation of pairwise associations through recurrent dynamics [30].

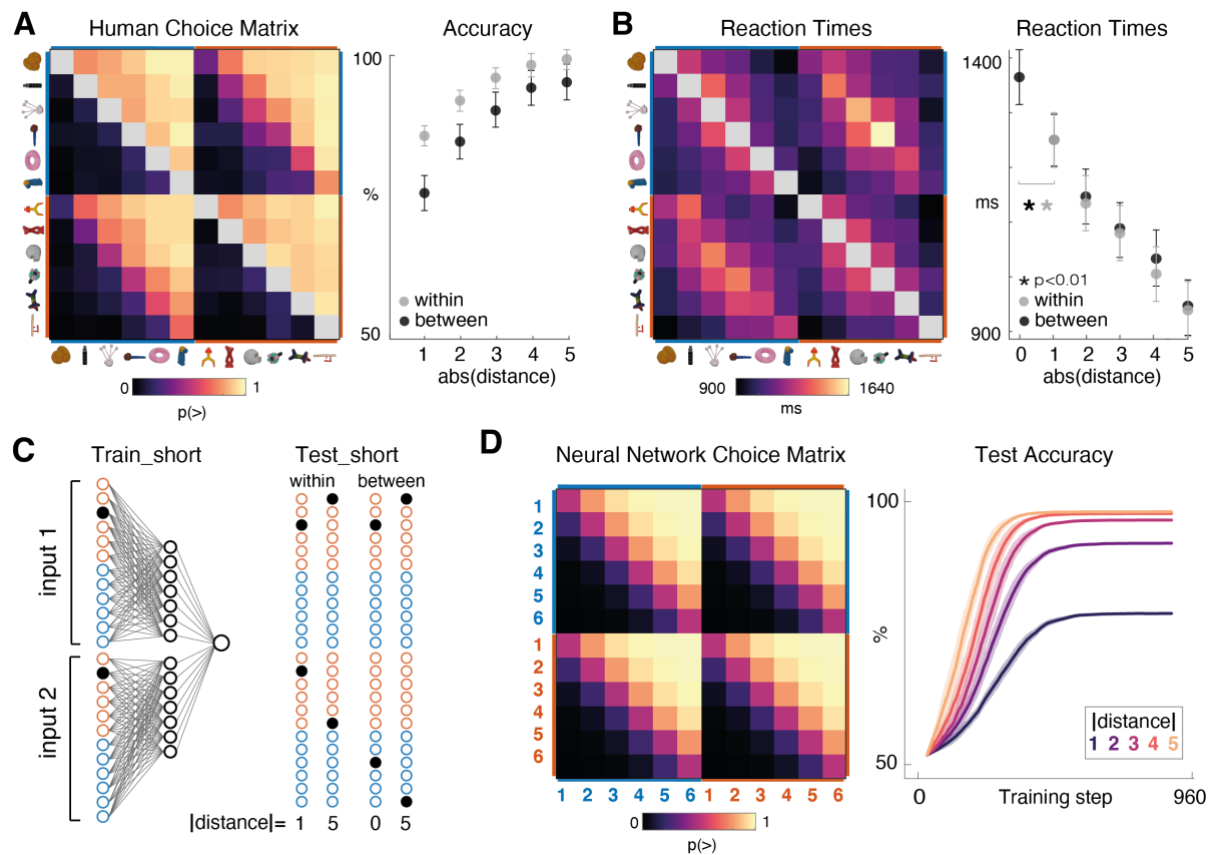

**Fig 2. Behaviour in humans and neural networks.** **A.** Left panel: human choice matrix. The colour of each entry indicates the probability of responding "greater than" during test\_short for the pair of items defined by the row and column. Colour scale is shown below the plot. Object identities are shown for illustration only (and were in fact resampled for each participant). Right panel: accuracy as a function of symbolic distance shown separately for within-context (e.g.  $i_3$  and  $i_5$ ; grey dots) and between context (e.g.  $i_3$  and  $i_9$ ; black dots) judgements. For between, accuracy data are with respect to a ground truth in which ranks are perfectly generalised across contexts (e.g. they infer that g.  $i_2 > i_9$ ). Errors bars are S.E.M. **B.** Equivalent data for reaction times. Note that a symbolic distance of zero was possible across contexts (e.g.  $i_2$  vs.  $i_8$ ) for which there was no correct answer but an RT was measurable. **C.** Left panel: neural network architecture and training scheme. Input nodes are coloured red and blue to denote the relevant context. Black dots illustrate an example training train in which objects  $i_2$  and  $i_3$  are shown. Right panel: example test trials both within and across context, with the symbolic distance signalled below. **D.** Left Panel: Choice matrix for the neural network, in the same format as A. Right Panel: Learning curves (showing accuracy over training epochs) for the neural network, shown separately for trials with different levels of symbolic distance. Shading is 1 S.E.M. over network replicants. Note that like humans, despite being trained exclusively on adjacent items, neural networks learned faster and performed better on non-adjacent items.

Moreover, behaviour also indicated *how* participants compared ranks between contexts. For example, they tended to infer  $i_7 > i_2$  and  $i_4 > i_{11}$  (Fig 2A). This implies a natural tendency to match rank orderings between contexts (e.g. that the 3<sup>rd</sup> item in one set was more brispy than the 4<sup>th</sup> in the other) in the absence of information about how objects were related across contexts. In line with this, we quantified cross-context accuracy relative to an agent that generalises perfectly and found that between-context accuracy was well above chance for

adjacent [ $75.9 \pm 20.9$  mean  $\pm$  SD;  $t_{33} = 7.3$ ,  $p < 0.001$ ] and non-adjacent [ $91.5 \pm 9.3$  mean  $\pm$  SD;  $t_{33} = 14.2$ ,  $p < 0.001$ ] trials. We also observed a *between-context* symbolic distance effect in reaction times (**Fig 2B**) [accuracy: 4.9% per rank,  $t_{33} = 7.5$ ,  $p < 0.001$ . RT: beta = 75 ms faster per rank;  $t_{33} = -7.8$ ,  $p < 0.001$ ]. Interestingly, participants were slowest when comparing items with equivalent rank across contexts (e.g. comparing  $i_2$  and  $i_8$ ), responding more slowly to these comparisons than to adjacent pairs of items both within [ $t_{33} = 3.23$ ,  $p < 0.004$ ], and between [ $t_{33} = 3.66$ ,  $p < 0.001$ ] contexts. Overall, these results are consistent with previous findings in both humans and monkeys, and have been taken to imply that participants automatically infer and represent the ordinal position of each item in the set [31].

Next, to understand the computational underpinnings of this behaviour and neural coding, we trained a neural network to solve an equivalent transitive inference problem. The network had a two-layer feedforward architecture with symmetric input weights, and was trained in a supervised fashion using stochastic online gradient descent [SGD] (**Fig. 2C**; see Methods). For this modelling exercise, we replaced the unrelated object images seen by participants for orthogonal (one-hot) vector inputs. On each trial the network received two inputs, denoting the images shown on the right and left of the screen, and was required to output whether one was “more” or “less” than the other just like participants (see Methods). At the point at which we terminated training (960 total trials, or 8 blocks of 60 trials each per context; see Methods), the network reached an average test accuracy of 97.74% on untrained comparisons (nonadjacent pairs) and 79.04% for trained (adjacent) pairs (**Fig. 2D**, right panel). The network showed a qualitatively identical pattern of generalisation as human participants, such as accuracy growing with rank distance (**Fig. 2D**, left panel), an observation confirmed by high correlations between human and neural network choice matrices [ $r = 0.98$ ,  $p < 0.001$  for averaged choice matrices; single participants  $r = 0.82 \pm 0.13$  mean  $\pm$  SD, all  $p$ -values  $< 0.001$ ].



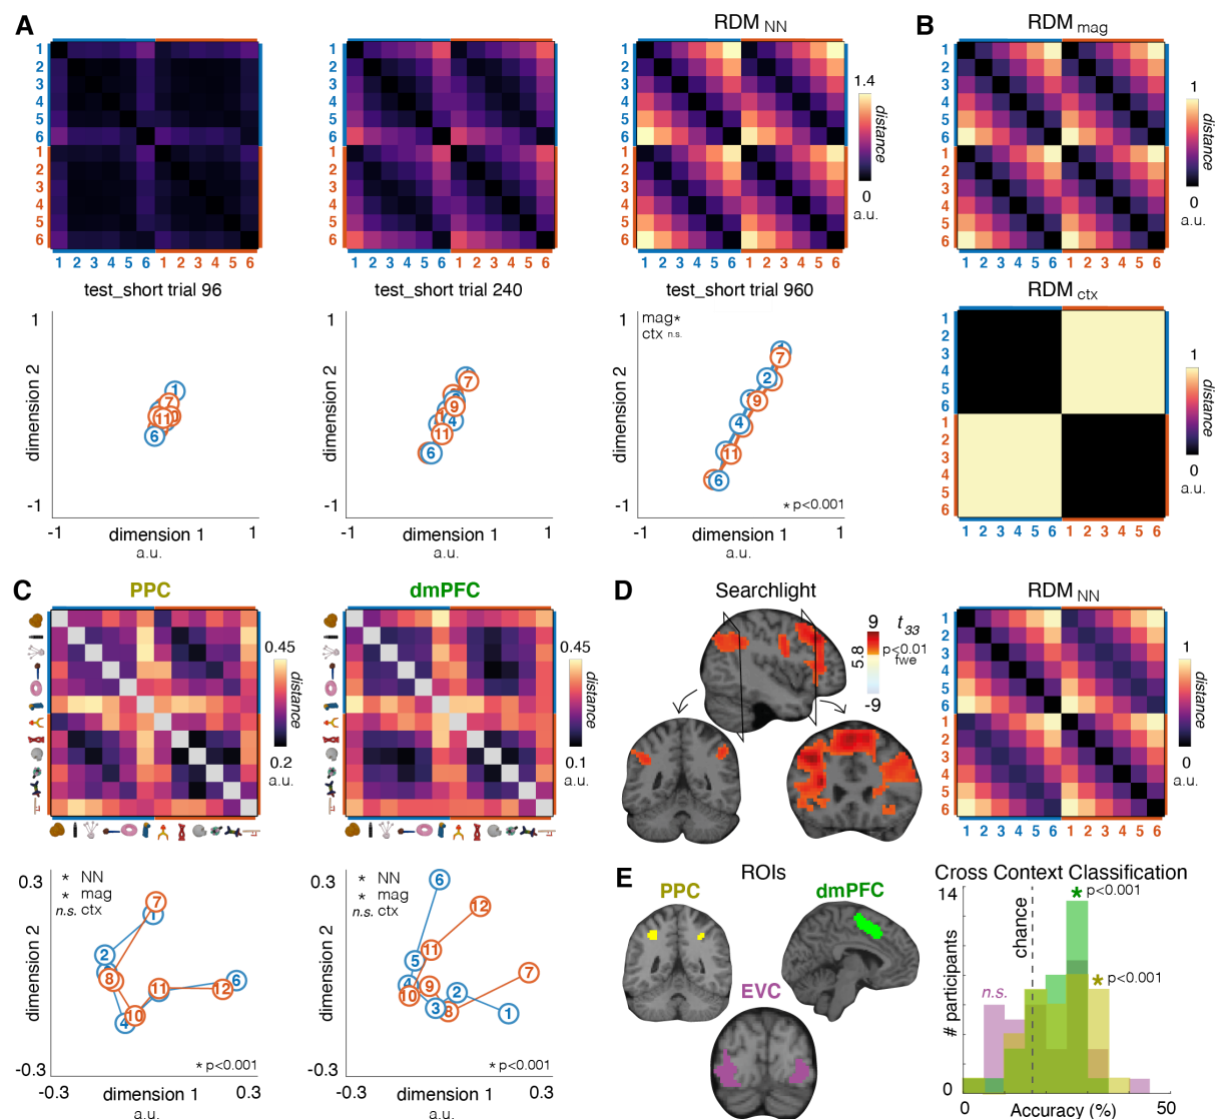

**Fig 3. Data from artificial networks and human BOLD signals.** **A.** Upper panels: RDM for the neural network. Each entry shows the distance between hidden unit activations evoked by a pair of stimuli, for three example timepoints during training. Lower panels: MDS plot in 2D for the RDM above. Each circle is a stimulus, coloured by its context. Distances between circles conserve similarities in the RDM. Note the emergence of two parallel lines. **B.** Model RDMs for magnitude (assumes linear spacing between ranks) and context (assumes a fixed distance between contexts). **C.** Upper panels: neural data RDMs from patterns of BOLD in the PPC (left) and dmPFC (right) regions of interest (ROIs). Lower panels: 2D MDS on BOLD data. Red and blue lines denote the two contexts; numbers circles denote items, with their rank signalled by the inset number. **D.** Voxels correlating reliably with the terminal RDM from the neural network ( $RDM_{NN}$ , see right panel) rendered onto sagittal (upper) and coronal (lower) slices of a standardised brain, at a threshold of FWE  $p < 0.01$ . **E.** Left panel: Regions of interest (ROIs) in posterior parietal cortex (PPC, yellow), dorsomedial prefrontal cortex (PFC, green) and a control region in Visual Cortex (VC, purple). Right panel: Frequencies of accuracy bins over participants for support vector machines (SVMs) trained to distinguish item ranks in one context after training on the other. Three histograms are overlaid, one for each ROI; colours correspond to those for panel D. Dashed line shows chance (16.6%).

After training, we examined neural geometry in the network by probing it with each (single) item  $i_1 - i_{12}$  in turn and calculating a representational dissimilarity matrix (RDM) from

resultant hidden layer activations (**Fig. 3A** top row). We then used multidimensional scaling (MDS) to visualise the similarity structure in just two dimensions (**Fig. 3A** bottom row). As training progressed, the network learned to represent the items in order of brispiness along two adjacent parallel neural lines. We know from recent work that a low dimensional solution is only guaranteed when the hidden layer weights are initialised from small values, sometimes known as the “rich” training regime [32]. After training in this regime, the data RDM from the hidden layer of the neural network ( $RDM_{NN}$ ) and an idealised distance matrix for parallel lines ( $RDM_{mag}$ ; **Fig. 3B** top panel) were highly correlated (Pearson  $r > 0.99$ ,  $p < 0.001$  for all 20 networks). However, we observed no correlation between  $RDM_{NN}$  and an RDM coding for distance between contexts ( $RDM_{ctx}$ ; **Fig. 3B** bottom panel) [Pearson  $r \leq 0.1$ ,  $p > 0.4$  for all networks], consistent with the observation that the magnitude lines were not just adjacent but fully overlapping by the end of training (**Fig. 3A**).

Next, we compared this representational geometry observed in the neural network to that recorded in BOLD signals whilst human participants judged the “brispiness” of successive items in the test\_short phase. We initially focus on regions of interest (ROIs) derived from an independent task in which participants judged the magnitude of Arabic digits, localised to the posterior parietal cortex (PPC) and dorsomedial prefrontal cortex (dmPFC; see **Fig. S1**), and later show the involvement of a larger fronto-parietal network using a whole-brain searchlight approach. In both ROIs, we saw strong correlation between the neural network RDM and  $RDM_{mag}$  (**Fig. 3C**) [PPC:  $t_{33} = 4.2$ ,  $p < 0.001$ ; dmPFC:  $t_{33} = 5.7$ ,  $p < 0.001$ ] but no effect of  $RDM_{ctx}$  [ $t_{33} < 1$ ,  $p > 0.65$  for both regions]. This echoes the data from the hidden layer of the neural network (see **Fig. 3A**), and accordingly we observed significant correlation with  $RDM_{NN}$  in both regions [PPC:  $t_{33} = 5.3$ ; dmPFC:  $t_{33} = 7.2$ , both  $p < 0.001$ ]. These effects held when similarity was defined across (rather than within) scanner runs using a crossvalidated RSA approach [ $RDM_{mag}$ : PPC:  $t_{33} = 4.8$ ,  $p < 0.001$ ; dmPFC:  $t_{33} = 4.7$ ,  $p < 0.001$ ;  $RDM_{ctx}$ : PPC:  $t_{33} = 0.3$ ,  $p = 0.78$ ; dmPFC:  $t_{33} = 0.4$ ,  $p = 0.69$ ;  $RDM_{NN}$ : PPC:  $t_{33} = 5.4$ , dmPFC:  $t_{33} = 6.0$ ,  $p < 0.001$ ; see **Fig. S2**; see Methods].

We visualised the neural geometry of the BOLD signals in both regions after reducing to two dimensions with MDS. In both ROIs, this yielded overlapping neural lines that reflected the rank-order of the novel objects (**Fig. 3C**, bottom row; see **Fig. S3**). However, unlike in the neural

network, manifolds (number lines) obtained from BOLD data were curved. Restricting our analysis to consecutive objects, we found neural distances involving the end anchors (e.g.  $i_1$  and  $i_6$ ) tended to be larger than those involving intermediate ranks [ $t_{33} = 4.8$ ,  $p < 0.001$ ;  $t_{33} = 4.4$ ,  $p < 0.001$  in PPC and dmPFC respectively]. We note that the curvature of these representational manifolds around their midpoint yields approximately orthogonal axes for rank and uncertainty, and that this phenomenon has been previously observed in scalp EEG recordings [25] and in multi-unit activity from area LIP of the macaque [33].

This similarity between representations in the neural network and human BOLD was confirmed by a whole-brain searchlight approach, for which we report only effects that pass a familywise error (FWE) correction level of  $p < 0.01$  with cluster size  $> 10$  voxels (see Methods). This revealed a fronto-parietal network in which multivoxel patterns resembled those in the trained neural network (RDM<sub>NN</sub>; **Fig. 3D**), with peaks in dmPFC [-33 -3 33;  $t_{33} = 9.3$ ,  $p_{\text{uncorr}} < 0.001$ ] and inferior parietal lobe [right: 51 -45 45;  $t_{33} = 6.94$ ,  $p_{\text{uncorr}} < 0.001$ ; left: -39 -51 36;  $t_{33} = 6.93$ ,  $p_{\text{uncorr}} < 0.001$ ]. As expected, this was driven by an explicit representation of magnitude distance, as correlations with RDM<sub>mag</sub> (**Fig. 3B**, top panel) peaked in the same regions [dmPFC: -33 -3 33;  $t_{33} = 9.4$ ,  $p < 0.001$ ; inferior parietal lobe right: 48 -45 42;  $t_{33} = 7.01$ ,  $p_{\text{uncorr}} < 0.001$ ; left: -39 -51 36;  $t_{33} = 7.15$ ,  $p_{\text{uncorr}} < 0.001$ ]. Notably, we did not observe an effect of RDM<sub>ctx</sub> (**Fig. 3B**, bottom panel) [no clusters survived FWE correction,  $t_{33} < 2.65$ , uncorrected  $p > 0.012$ ], indicating that neural representations for similarly-ranked items were effectively superimposed, as in the neural network.

This representational format, whereby ranked items are represented on parallel manifolds, lends itself to generalisation across contexts, i.e. between items with distinct identity but equivalent brispieness [23,24]. To test this, we trained a support vector machine on binary classifications among ranks for context A and evaluated it on the (physically dissimilar) objects in context B. We found above-chance classification in PPC and dmPFC (**Fig. 3E**) [ $t_{33} = 4.39$ ,  $p < 0.001$ ;  $t_{33} = 4.01$ ,  $p < 0.001$ ], but not in an extrastriate visual cortex ROI that also showed significant activation during the independent localiser [ $t_{33} = 1.75$ ,  $p > 0.08$ ]. These analyses not only cross-validated across runs, but also counterbalanced response contingencies, and so are unlikely to be due to any spurious effect of motor control. Together, these results show that

neural patterns indexed a concept of “brispieness” divorced from the physical properties of the objects themselves.

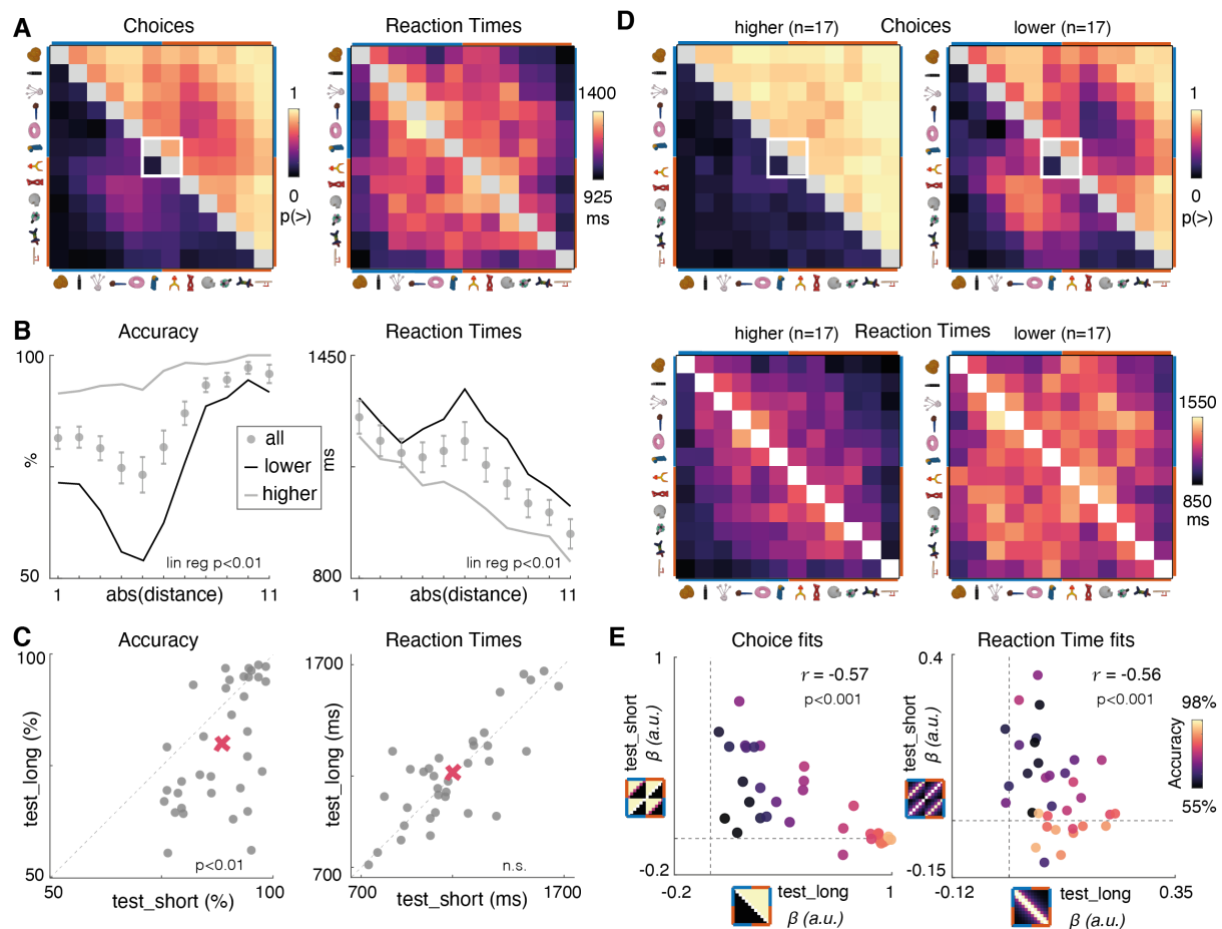

Next, we turned to our central question of how neural representations are reconfigured following a single piece of new information about the overall knowledge structure. After test\_short, participants performed a brief “boundary training” session in which they learned

that object  $i_7$  (the most brispy object in context B) was less brispy than object  $i_6$  (the least brispy object in context A). This information was acquired over just 20 trials in which participants repeatedly judged whether item  $i_6$  or  $i_7$  was “more” or “less” brispy. Following this boundary training, participants performed a final session, test\_long, which was identical in every respect to test\_short.

Our main question was whether and how the boundary training reshaped both behaviour and neural coding. The average choice and RT matrices observed during test\_long are shown in **Fig. 4A**. As can be seen, on aggregate participants used knowledge of the relation between items  $i_6$  and  $i_7$  to correctly infer that all objects lay on a single long axis of brispiness (1-12). We confirmed this in two ways. First, unlike in test\_short, the symbolic distance effect now spanned the whole range of items 1-12 (with a “dip” near the boundary between contexts; **Fig. 4B**, left) [accuracy: 2.1% per rank;  $t_{33} = 7.8$ ,  $p < 0.001$ . RT: -29 ms per rank;  $t_{33} = -10.4$ ,  $p < 0.001$ ]. Next, we directly quantified the full pattern of responses seen in **Fig. 4A** by constructing idealised ground truth choice and reaction time (RT) matrices (**Fig. S4A**). These matrices reflected the assumption that the items either lay on two parallel short axes (as inferred in test\_short) or a single long axis (as was correct in test\_long). Fitting these to human behavioural matrices using competitive regressions, we found that while the long axis matrix fit the test\_long behavioural data [Choice:  $t_{33} = 9.2$ ,  $p < 0.0001$ ; RTs:  $t_{33} = 7.9$ ,  $p < 0.0001$ ] there remained a strong residual fit to the short axis choice and RT patterns [Choice:  $t_{33} = 5.0$ ,  $p < 0.0001$ ; RTs:  $t_{33} = 3.5$ ,  $p < 0.01$ ].

In fact, there was substantial variability in performance among participants on test\_long, and median accuracy dropped to 79.8%, compared with 88.3% in test\_short (**Fig. 4C** left panel). As average RTs did not differ between test\_short ( $1153 \pm 41$  ms) and test\_long ( $1166 \pm 43$  ms) [ $t_{33} = 0.49$ ,  $p = 0.63$ ], this difference was probably not attributable to a decrement in attention between the two conditions (**Fig. 4C** right panel). Instead, we reasoned that some participants might have failed to fully restructure their knowledge of the transitive series, retaining the belief that the two sets were still independent and treating the relative brispiness of item  $i_6 < i_7$  as an exception. Qualitatively, participants who performed less accurately (defined by a median split; **Fig. 4D** right panels) behaved as if they were still in test\_short (**Fig. 4E**, left panel), whereas those who performed more accurately generalised the few-shot information about  $i_6$

and  $i_7$  to update the rank of all other items (**Fig. 4D**, left panels). We found a negative correlation across the cohort between fits of test\_long to the test\_long versus test\_short model behavioural matrices (**Fig. 4E**, right panel) [choices:  $r = -0.56$ ,  $p < 0.001$ ; RT:  $r = -0.57$ ,  $p < 0.001$ ]. We ruled out the possibility that participants could have simply failed to learn from the boundary training session, as they reported the newly trained object relation ( $i_6 < i_7$ )  $86 \pm 15\%$  of the time in test\_long, compared with  $5.8 \pm 19\%$  of the time in test\_short (mean  $\pm$  SD;  $t_{33} = 18.0$ ,  $p < 0.0001$ ; see **Fig. 4D**). Thus, whilst average participant choices suggested knowledge of a long axis, there was a sizeable cohort that only partially integrated the new relation into their knowledge structure.

Next, we turned to the geometry of neural representations in BOLD during the test\_long phase. We considered two hypotheses for how neural representations might adjust following boundary training to permit successful performance on test\_long (**Fig. 5A**). Firstly, under a *hierarchical* coding scheme, the parallel lines observed in test\_short ( $\text{RDM}_{\text{mag}}$ ) might separate along a direction perpendicular to the within-context magnitude axis, so that one dimension codes for a “superordinate” rank given by context (i.e.  $[i_1 - i_6] > [i_7 - i_{12}]$ ) and the other for rank within each context (e.g.  $i_2 > i_3$  and  $i_9 > i_{10}$ ) [24]. This effectively implements a place-value (or “dimension-value”) representational scheme (akin to numbers in base 6; **Fig. 5A**, central panel). Note that this hierarchical coding scheme would not require altering the already learned neural representation, but would just incorporate additional contextual information, thus predicting increased coefficients for  $\text{RDM}_{\text{ctx}}$ . Alternatively, under an *elongation* scheme, objects could be neurally rearranged on a single line stretching from  $i_1$  to  $i_{12}$  to match our designated ground truth ranking on a single dimension ( $\text{RDM}_{\text{mag\_long}}$ ; **Fig. 5A**, right panel). We thus constructed a new  $\text{RDM}_{\text{mag\_long}}$  to encode the prediction of this elongation model (**Fig. 5C**, top panel). Both the *hierarchical* and the *elongation* schemes could potentially allow learning from the boundary training (for items  $i_6$  and  $i_7$ ) to be rapidly generalised to comparisons.



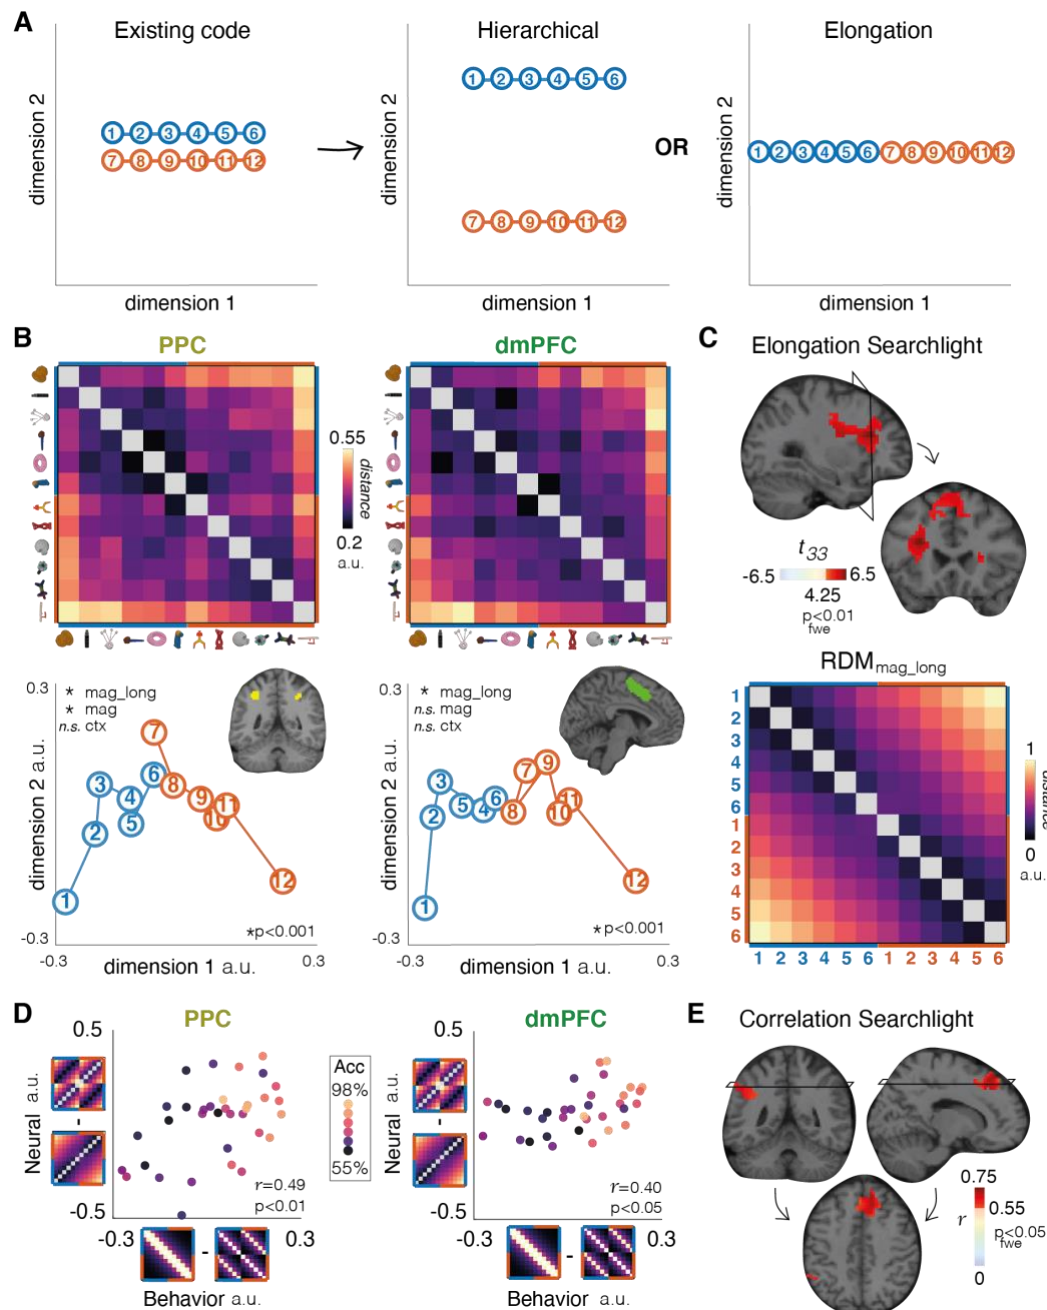

**Figure 5. Neural data from test\_long.** **A.** Schematic illustration of hypotheses about how the extant neural code (after test\_short, right panel) might be transformed after test\_long. The hierarchical hypothesis (middle panel) proposes that magnitude and context are represented on factorised (orthogonal) neural axes. Under the elongation hypothesis (right panel), the items are rearranged on a one-dimensional neural manifold (or magnitude line). **B.** Upper panels: neural RDMs in the PPC and dmPFC after test\_long (left panels), and MDS plots (right panels), with ROIs inset. Lower panels: MDS projection of each item in the two contexts (red and blue dots) in test\_long for the PPC (right) and dmPFC (left) ROIs. **C.** Model RDM for magnitude after test\_long, and regions correlating with this RDM in a searchlight analysis, rendered onto sagittal and coronal slices of a template brain. **D.** Neural-behavioural integration correlations in PPC and dmPFC ROIs. The x and y axis show relative behavioural model fits (test\_long - test\_short RT matrices) vs neural fits (elongation - hierarchical RDMs). The legend displays the relative RDMs (y-axis) and relative RT matrices (x-axis), each rotated into alignment with the axis, from which the neural and behavioural scores were calculated. Each dot is a participant, coloured by their accuracy during test\_long. **E.** Voxels showing a significant neural-behavioural correlation (as defined in panel D) identified with a searchlight analysis, within the fronto-parietal network identified during test\_short (see Fig. 3D) rendered on a template brain with a FWE threshold of  $p < 0.05$ . Brackets on top two BOLD maps indicate the horizontal slice displayed on the bottom image.

We first compared these schemes empirically by fitting model RDMs to multivoxel data in PPC and dmPFC (**Fig. 5B**, top row). We compared two regression models, one in which the idealised RDM was generated under the hierarchical scheme and one under the elongation scheme. Each regression model additionally included a predictor coding for  $RDM_{mag}$  to accommodate any residual variance due to continued use of a test\_short strategy (**Fig. S4B**). We found that neural data was better fit by the elongation model in both PPC and dmPFC [ $t_{33} = 4.2$ ,  $p < 0.001$ ;  $t_{33} = 5.2$ ,  $p < 0.001$ ; paired t-test on residual sum of squared error], and indeed, observed positive correlations with  $RDM_{mag\_long}$  in both regions [PPC:  $t_{33} = 4.3$ ,  $p < 0.001$ ; dmPFC:  $t_{33} = 6.0$ ,  $p < 0.001$ ]. When we plotted the neural geometry associated with the 12 items in these regions, it can be seen that they lay on a single (curved) line, consistent with the elongation scheme (**Fig. 5B**, bottom row; also see **Fig. S2**). We found no evidence for the hierarchical coding scheme, and in particular no effect of context in our ROIs [PPC:  $t_{33} = 0.2$ , dmPFC,  $t_{33} = 0.6$ , both p-values  $> 0.5$ ]. Finally, we confirmed the fit of the elongation model using a searchlight approach (**Fig. 5C**) [peak in left frontal gyrus: -30 23 23,  $t_{33} = 6.60$ ,  $p < 0.01$  after FWE correction].

Interestingly, while neural codes in the dmPFC no longer correlated with  $RDM_{mag}$  at test\_long [ $t_{33} = 1.9$ ,  $p = 0.06$ ; t-test on z-scored Pearson correlations with  $RDM_{mag}$ ], the PPC continued to residually code for two overlapping neural lines [ $t_{33} = 3.1$ ,  $p = 0.004$ ; regression with design matrix [ $RDM_{mag}$ ,  $RDM_{mag\_long}$ ], t-test on z-scored  $RDM_{mag}$  beta weights]. We speculated that this residual coding for the test\_short geometry (i.e. parallel lines) may predict the aforementioned inability of some participants to integrate the boundary information (**Fig. 4E**). Indeed, we found that participants with a greater tendency to respond as if they were still in test\_short displayed neural geometries more reminiscent of test\_short in PPC [ $r = 0.50$ ,  $p = 0.002$ ; Pearson correlation between behavioural fits to test\_short RT matrix and neural fit to  $RDM_{mag}$ ]. We summarized this relationship by relating the degree of neural elongation (difference in fit for  $RDM_{mag\_long} - RDM_{mag}$ ) to the degree of behavioural integration (difference in fit of idealised choice matrices, test\_long - test\_short) (**Fig. 5D** left panel) [ $r = 0.49$ ,  $p < 0.01$ ]. We also saw this relationship in dmPFC (**Fig. 5D** right panel) [ $r = 0.40$ ,  $p < 0.05$ ], but it did not reach threshold in visual cortex [ $r = 0.33$ ,  $p = 0.06$ ]. Employing a searchlight approach within the fronto-parietal network that coded for  $RDM_{mag}$  during test\_short (see **Fig. 3D**), we found that this neural-behavioural relationship was expressed most strongly in right Superior Frontal



Gyrus (**Fig. 5E** right; thresholded at FWE  $p < 0.05$ ,  $r \geq 0.55$ ,  $p_{\text{uncorr}} < 0.001$ ; also see **Fig. S5**) [peak correlation: 17 34 54;  $r = 0.71$ ,  $p_{\text{uncorr}} < 0.001$ ; significant at FWE  $p < 0.01$ ] along with being evident in left parietal cortex (**Fig. 5E** left) [peak correlation: -48 45 42;  $r = 0.65$ ,  $p_{\text{uncorr}} < 0.001$ ; significant at FWE  $p < 0.05$ ].

How might knowledge assembly occur on the computational level? Training the neural network with vanilla online stochastic gradient descent [SGD] (as in **Fig. 2** and **Fig. 3**) does not naturally allow the rapid knowledge assembly characteristic of human behaviour. After prolonged “boundary” training on item  $i_6 < i_7$ , the network simply learns this comparison as an exception (**Fig. 6B**), thus failing to generalise the greater (lesser) brispieness to other items in context B (A). In asking how the connectionist modelling framework could be adapted to account for knowledge assembly, one assumption might be that human participants store and mentally replay the pairwise associations learned previously, intermingling these with instances of boundary training to avoid catastrophic interference [34,35]. However, note that boundary training consisted of just 20 trials with no subsequent rest period that would have allowed time for replay to occur (**Fig. 1**; also see **Fig. S6**). Thus, in the final part of our report, we describe an adaptation of SGD that can account for the behaviour and neural coding patterns exhibited by human participants, including the rapid reassembly of knowledge and its expression on a fast-changing neural manifold.

We reasoned that a simple computational innovation within the neural network could account for the knowledge assembly observed at test\_long. As we have seen, the network learned to embed stimuli on a single neural manifold that represents the transitive series from either context with overlapping embeddings (e.g. **Fig. 3A**). The assumption we make now is that the network retains a certainty estimate regarding each relation in the embedding space (we call this the *certainty matrix* **A**). For example, as the relation between items  $i_3$  and  $i_4$  is acquired by the network, the loss consequently decreases, and the respective symmetric certainty value  $A_{3,4} = A_{4,3}$  increases. With this assumption, new updates can propagate to conserve more certain relations in the embedding space, while allowing less certain relations to change. Specifically, gradient updates to the representation of item  $k$  are mutually applied to all other items ( $i_j \neq i_k$ ), but scaled by certainty  $A_{j,k}$ , with free parameter  $\gamma$  determining the rate at which the certainty matrix is updated (see Methods).

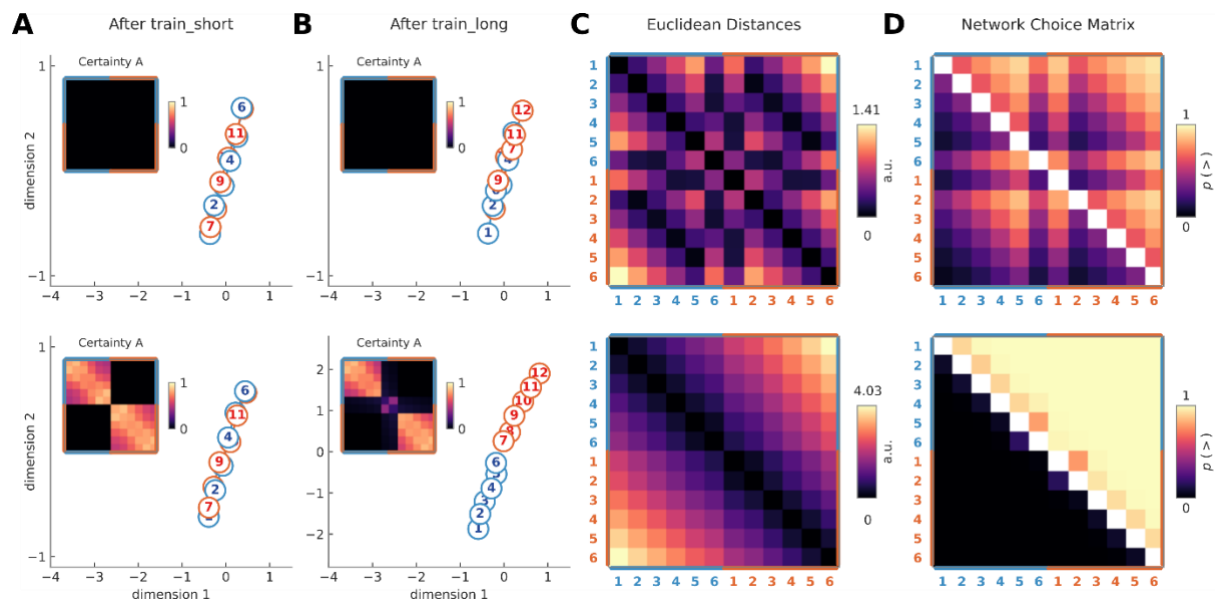

**Figure 6. Knowledge assembly in artificial neural network.** Top row: Data generated with neural networks employing a gamma parameter that maximised the fit (mean squared error) to average choice matrices from poor performers (accuracy < median,  $\gamma = 2e^{-3}$ ). This leads to SGD-like training and. Bottom row: Data generated with neural networks employing a gamma parameter that maximised the fit (mean squared error) to average choice matrices from good performers (accuracy > median,  $\gamma = 0.11$ ). This minimal change allows the network to behave like the best human performers. **A** Two dimensional MDS of hidden layer representations after train\_short (top: low performers, bottom: high performers). Note the lack of certainty acquisition for  $\gamma = 2e^{-3}$  (top panel), suggesting that there is no representational relational among items. **B** Two dimensional MDS of hidden layer representations after boundary training for networks fit to low (top panel) and high (bottom panel) performers. **C** Euclidean distances of the hidden layer representations after boundary training are displayed for both the networks fit to low (top) and high (bottom) performers. **D** Test\_long network choice matrices are displayed. These choice matrices result fitting the free parameter gamma separately for low (top) and high (bottom) performers.

First, we confirmed that we could capture the test\_long behaviour of both high performing human participants, as well and the participants who learned  $i_6 > i_7$  as an exception, by varying  $\gamma$  (Fig 6D). This exercise revealed good fits to the behaviour of low performers (Fig. 6D top row) at  $\gamma = 2e^{-3}$ , while  $\gamma = 0.11$  fit the participants who correctly assembled the knowledge structures (Fig. 6D bottom row, also see Fig. S7B; see Methods). We then gave these networks approximately the same number of train\_short trials as human participants (960) to ensure that these two network types (low performer fit:  $\gamma = 2e^{-3}$ ; high performer fit:  $\gamma = 0.11$ ) behaved similarly during test\_short, as observed in the human participants. Indeed, behavioural performance and training dynamics were indistinguishable across  $\gamma$  values after train\_short (Fig. S7A), in line with the observation that the network learned to represent items on two parallel magnitude lines, regardless of the value of  $\gamma$  (Fig. 6A top:  $\gamma = 2e^{-3}$  vs bottom  $\gamma = 0.11$  panel).

Although test\_short behaviour and neural patterns were similar, the certainty matrix A (Fig. 6A insets) still depended on  $\gamma$ . The network fit to less accurate participants (and thus trained with SGD-like dynamics, as  $\gamma \approx 0$ ), failed to encode within-context relations with certainty (Fig. 6A inset), and so the boundary items were treated as an exception (Fig. 6D top panel). In contrast, the network fit to more accurate participants learned with high certainty during test\_short that  $i_1 - i_6$  and  $i_7 - i_{12}$  were related ( $\gamma = 0.11$ , Fig. 6D bottom panel). As a result, this allowed mutual parameter updates to conserve within-context relations after the limited information provided during boundary training (Fig. 6B, lower panel). These updates effectively pushed the manifolds in opposing directions, qualitatively consistent with the elongation scheme observed in humans. Interestingly, low-performers were also well fit by  $\gamma = 0.87$ , in line without finding that increasing gamma causes overly-rapid updates leading  $i_6$  &  $i_7$  to disconnect from their sets (Fig. S7C), suggesting a “sweet spot” for knowledge assembly (Fig. S7B). In sum, this model generalises the case of vanilla SGD ( $\gamma = 0$ ), making it possible to recover both successful and less successful knowledge assembly observed in humans (Fig. 6, also see Fig. S7).

## Discussion

We report behavioural and neural evidence for “knowledge assembly” in human participants. Just 20 boundary training trials were enough for most participants to learn how two sets of related objects were linked. Strikingly, neural representations in multivoxel BOLD patterns rapidly reconfigured into a novel geometry that reflects this knowledge, especially in dorsal stream structures such as PPC and dmPFC. A subset of participants instead considered the boundary relation  $i_6 > i_7$  an exception, and performed more poorly on the subsequent test of transitive inference. while displaying a neural geometry that more consistent with that belief.

The list linking task we use [27] requires participants to make inferences that go beyond the training data – in this case, after boundary training it is parsimonious to assume that because item  $i_6 > i_7$ , then item  $i_7 < i_{1-6}$ , and  $i_6 > i_{7-12}$ . How are these inferences made? One possibility is that a dynamic process in which updates spread across items via online recurrence occurs at the time of the decision, as proposed by models of transitive inference based on the

hippocampus [30]. However, because it takes more cycles to bridge the associative distance between disparate items (e.g.  $i_1$  and  $i_6$ ), this scheme predicts that these comparisons would garner longer reaction times and lower accuracy rates— the opposite of the symbolic distance effect we report here.

An alternative is that periods of sleep or quiet resting may allow for replay events, such as those associated with sharp wave ripples in rodents and humans, which might facilitate planning and inference [36], as well as spontaneous reorganisation of mental representations during statistical learning [37]. While we acknowledge that these explanations are not entirely ruled out on the basis of our data, our paradigm allowed very little time for rehearsal or replay, as boundary training was few-shot, lasting approximately 2 minutes and comprising just 20 trials. Instead, our model proposes that items are earmarked during initial learning in a way that might help future knowledge restructuring, by coding certainty about relations among items (here, a transitive ordering). We describe such a mechanism, and show that it can account for our data. While our model is agnostic about how certainty is encoded, one idea is that in neural systems connections may become tagged in ways that render them less labile. On a conceptual level, this resembles previously proposed solutions to continual learning which freeze synapses to protect existing knowledge from overwriting [38,39]. Thus, notwithstanding a recent interest in replay as a basis for structure memory – including in humans [40–42] – our model has implications for the understanding of other phenomena that involve retrospective re-evaluation or representational reorganisation, such as sensory preconditioning [43].

One curiosity of our findings is that neural manifolds for the transitive series were not straight as in the neural networks, but instead were inflected around their midpoints (ranks 3/4 in test\_short or 6/7 in test\_long), forming a horseshoe shape in low-dimensional space. We have previously observed this pattern in geometric analysis of whole-brain scalp EEG signals evoked by transitively ordered images [25] and a recent report has emphasised a similar phenomenon in macaque PPC and medial PFC during discrimination of both faces and dot motion patterns [33]. The reasons for this form to the manifold is unclear. One possibility is that the axis coding for choice certainty is driven by the engagement of control processes currently missing from our neural network model [44]. Another is that the horseshoe shape allows neighbouring items

to be linearly discriminated, by the judicious application of hyperplanes with gradually varying angle with respect to the neural manifold. Resolving this issue is likely to be an important goal for future studies.

In sum, we observed rapid reorganization of neural codes for object relations in dorsal stream structures, including the PPC and dmPFC. This is consistent with a longstanding view that these structures, and especially the parietal cortex, encode an abstract representation of magnitude or a mental “number line” [7,45,46]. Recently, many studies have emphasised instead that the medial temporal lobe, and especially the hippocampus and entorhinal cortex, may be important for learning about the structure of the world [3,6,22,47]. One important difference between our work and many studies reporting MTL structures is that our study involved an active decision task (infer brispiness) whereas previous studies have used passive viewing or implicit tasks to measure neural structure learning. It may be that dorsal stream structures encode structure most keenly when relevant for an ongoing task. We do not doubt that both regions are important for coding relational knowledge, but their precise contributions remain to be defined.

## References

1. Lake BM, Ullman TD, Tenenbaum JB, Gershman SJ. Building machines that learn and think like people. *Behav Brain Sci.* 2017;40: e253. doi:10.1017/S0140525X16001837
2. Morton NW, Preston AR. Concept formation as a computational cognitive process. *Current Opinion in Behavioral Sciences.* 2021;38: 83–89. doi:10.1016/j.cobeha.2020.12.005
3. Behrens TEJ, Muller TH, Whittington JCR, Mark S, Baram AB, Stachenfeld KL, et al. What Is a Cognitive Map? Organizing Knowledge for Flexible Behavior. *Neuron.* 2018;100: 490–509. doi:10.1016/j.neuron.2018.10.002
4. Lynn CW, Bassett DS. How humans learn and represent networks. *Proc Natl Acad Sci USA.* 2020;117: 29407–29415. doi:10.1073/pnas.1912328117
5. Tervo DGR, Tenenbaum JB, Gershman SJ. Toward the neural implementation of structure learning. *Curr Opin Neurobiol.* 2016;37: 99–105. doi:10.1016/j.conb.2016.01.014
6. Bellmund JLS, Gardenfors P, Moser EI, Doeller CF. Navigating cognition: Spatial codes for human thinking. *Science.* 2018;362. doi:10.1126/science.aat6766
7. Summerfield C, Luyckx F, Sheahan H. Structure learning and the posterior parietal cortex. *Prog Neurobiol.* 2019; 101717. doi:10.1016/j.pneurobio.2019.101717
8. Tolman EC. Cognitive maps in rats and men. *Psychol Rev.* 1948;55: 189–208.
9. Schapiro AC, Kustner LV, Turk-Browne NB. Shaping of object representations in the human medial temporal lobe based on temporal regularities. *Curr Biol.* 2012;22: 1622–7. doi:10.1016/j.cub.2012.06.056
10. Schapiro AC, Rogers TT, Cordova NI, Turk-Browne NB, Botvinick MM. Neural representations of events arise from temporal community structure. *Nat Neurosci.* 2013;16: 486–92. doi:10.1038/nn.3331
11. Garvert MM, Dolan RJ, Behrens TE. A map of abstract relational knowledge in the human hippocampal-entorhinal cortex. *Elife.* 2017;6. doi:10.7554/eLife.17086
12. Zeithamova D, Preston AR. Temporal Proximity Promotes Integration of Overlapping Events. *Journal of Cognitive Neuroscience.* 2017;29: 1311–1323. doi:10.1162/jocn\_a\_01116
13. Whittington JCR, Muller TH, Mark S, Chen G, Barry C, Burgess N, et al. The Tolman-Eichenbaum Machine: Unifying Space and Relational Memory through Generalization in the Hippocampal Formation. *Cell.* 2020;183: 1249–1263.e23. doi:10.1016/j.cell.2020.10.024

14. Dordek Y, Soudry D, Meir R, Derdikman D. Extracting grid cell characteristics from place cell inputs using non-negative principal component analysis. *eLife*. 2016;5: e10094. doi:10.7554/eLife.10094
15. Klukas M, Lewis M, Fiete I. Efficient and flexible representation of higher-dimensional cognitive variables with grid cells. Bush D, editor. *PLoS Comput Biol*. 2020;16: e1007796. doi:10.1371/journal.pcbi.1007796
16. Saxe A, Nelli S, Summerfield C. If deep learning is the answer, what is the question? *Nat Rev Neurosci*. 2021;22: 55–67. doi:10.1038/s41583-020-00395-8
17. Lindsay G. Convolutional Neural Networks as a Model of the Visual System: Past, Present, and Future. *J Cogn Neurosci*. 2020; 1–15. doi:10.1162/jocn\_a\_01544
18. Barrett DGT, Hill F, Santoro A, Morcos AS, Lillicrap T. Measuring abstract reasoning in neural networks. *arXiv:180704225 [cs, stat]*. 2018 [cited 8 Oct 2020]. Available: <http://arxiv.org/abs/1807.04225>
19. Chang MB, Gupta A, Levine S, Griffiths TL. Automatically Composing Representation Transformations as a Means for Generalization. *arXiv:180704640 [cs, stat]*. 2019 [cited 5 May 2021]. Available: <http://arxiv.org/abs/1807.04640>
20. Lake BM, Salakhutdinov R, Tenenbaum JB. Human-level concept learning through probabilistic program induction. *Science*. 2015;350: 1332–8. doi:10.1126/science.aab3050
21. Higgins I, Sonnerat N, Matthey L, Pal A, Burgess CP, Bosnjak M, et al. SCAN: Learning Hierarchical Compositional Visual Concepts. *arXiv:170703389*. 2017.
22. Morton NW, Sherrill KR, Preston AR. Memory integration constructs maps of space, time, and concepts. *Current Opinion in Behavioral Sciences*. 2017;17: 161–168. doi:10.1016/j.cobeha.2017.08.007
23. Bernardi S, Benna MK, Rigotti M, Munuera J, Fusi S, Salzman CD. The Geometry of Abstraction in the Hippocampus and Prefrontal Cortex. *Cell*. 2020; S0092867420312289. doi:10.1016/j.cell.2020.09.031
24. Sheahan H, Luyckx F, Nelli S, Teupe C, Summerfield C. Neural state space alignment for magnitude generalization in humans and recurrent networks. *Neuron*. 2021;109: 1214–1226.e8. doi:10.1016/j.neuron.2021.02.004
25. Luyckx F, Nili H, Spitzer B, Summerfield C. Neural structure mapping in human probabilistic reward learning. *Elife*. 2019;8. doi:10.7554/eLife.42816
26. Woocher FD, Glass AL, Holyoak KJ. Positional discriminability in linear orderings. *Memory & Cognition*. 1978;6: 165–173. doi:10.3758/BF03197442

27. Treichler FR, Van Tilburg D. Concurrent conditional discrimination tests of transitive inference by macaque monkeys: List linking. *Journal of Experimental Psychology: Animal Behavior Processes*. 1996;22: 105–117. doi:10.1037/0097-7403.22.1.105
28. Horst JS, Hout MC. The Novel Object and Unusual Name (NOUN) Database: A collection of novel images for use in experimental research. *Behav Res*. 2016;48: 1393–1409. doi:10.3758/s13428-015-0647-3
29. D’Amato MR, Colombo M. The symbolic distance effect in monkeys (*Cebus apella*). *Animal Learning & Behavior*. 1990;18: 133–140. doi:10.3758/BF03205250
30. Kumaran D, McClelland JL. Generalization through the recurrent interaction of episodic memories: a model of the hippocampal system. *Psychol Rev*. 2012;119: 573–616. doi:10.1037/a0028681
31. Chen S, Swartz KB, Terrace HS. Knowledge of the Ordinal Position of List Items in Rhesus Monkeys. *Psychol Sci*. 1997;8: 80–86. doi:10.1111/j.1467-9280.1997.tb00687.x
32. Flesch T, Juechems K, Dumbalska T, Saxe A, Summerfield C. Rich and lazy learning of task representations in brains and neural networks. *Neuroscience*; 2021 Apr. doi:10.1101/2021.04.23.441128
33. Okazawa G, Hatch CE, Mancoo A, Machens CK, Kiani R. Representational geometry of perceptual decisions in the monkey parietal cortex. *Cell*. 2021; S0092867421006528. doi:10.1016/j.cell.2021.05.022
34. McClelland JL, McNaughton BL, O’Reilly RC. Why there are complementary learning systems in the hippocampus and neocortex: insights from the successes and failures of connectionist models of learning and memory. *Psychol Rev*. 1995;102: 419–57.
35. Kumaran D, Hassabis D, McClelland JL. What Learning Systems do Intelligent Agents Need? Complementary Learning Systems Theory Updated. *Trends Cogn Sci*. 2016;20: 512–534. doi:10.1016/j.tics.2016.05.004
36. Hunt LT, Daw ND, Kaanders P, MacIver MA, Mugan U, Procyk E, et al. Formalizing planning and information search in naturalistic decision-making. *Nat Neurosci*. 2021 [cited 2 Jul 2021]. doi:10.1038/s41593-021-00866-w
37. Liu Y, Dolan RJ, Kurth-Nelson Z, Behrens TEJ. Human Replay Spontaneously Reorganizes Experience. *Cell*. 2019;178: 640-652 e14. doi:10.1016/j.cell.2019.06.012
38. Zenke F, Poole B, Ganguli S. Continual Learning Through Synaptic Intelligence. *arXiv:170304200*. 2017.
39. Kirkpatrick J, Pascanu R, Rabinowitz N, Veness J, Desjardins G, Rusu AA, et al. Overcoming catastrophic forgetting in neural networks. *Proc Natl Acad Sci U S A*. 2017;114: 3521–3526. doi:10.1073/pnas.1611835114



40. Kurth-Nelson Z, Economides M, Dolan RJ, Dayan P. Fast Sequences of Non-spatial State Representations in Humans. *Neuron*. 2016;91: 194–204.  
doi:10.1016/j.neuron.2016.05.028
41. Wimmer GE, Liu Y, Vehar N, Behrens TEJ, Dolan RJ. Episodic memory retrieval success is associated with rapid replay of episode content. *Nat Neurosci*. 2020;23: 1025–1033.  
doi:10.1038/s41593-020-0649-z
42. Nour MM, Liu Y, Arumham A, Kurth-Nelson Z, Dolan RJ. Impaired neural replay of inferred relationships in schizophrenia. *Cell*. 2021; S0092867421007479.  
doi:10.1016/j.cell.2021.06.012
43. Wimmer GE, Daw ND, Shohamy D. Generalization of value in reinforcement learning by humans. *The European journal of neuroscience*. 2012;35: 1092–104.  
doi:10.1111/j.1460-9568.2012.08017.x
44. Botvinick MM, Braver TS, Barch DM, Carter CS, Cohen JD. Conflict monitoring and cognitive control. *Psychol Rev*. 2001/08/08 ed. 2001;108: 624–52.
45. Hubbard EM, Piazza M, Pinel P, Dehaene S. Interactions between number and space in parietal cortex. *Nat Rev Neurosci*. 2005;6: 435–48. doi:10.1038/nrn1684
46. Walsh V. A theory of magnitude: common cortical metrics of time, space and quantity. *Trends Cogn Sci*. 2003;7: 483–8. doi:10.1016/j.tics.2003.09.002
47. Yu LQ, Park SA, Sweigart SC, Boorman ED, Nassar MR. Do grid codes afford generalization and flexible decision-making? *arXiv:210616219 [q-bio]*. 2021 [cited 16 Sep 2021]. Available: <http://arxiv.org/abs/2106.16219>
48. Niv Y, Daniel R, Geana A, Gershman SJ, Leong YC, Radulescu A, et al. Reinforcement Learning in Multidimensional Environments Relies on Attention Mechanisms. *Journal of Neuroscience*. 2015;35: 8145–8157. doi:10.1523/JNEUROSCI.2978-14.2015

## Online Methods

### *Participants*

Thirty-seven healthy adult participants were recruited for this study. One was excluded for failure to reach performance threshold (see above), and two more for practical reasons (failure to attend scanning session; discomfort in scanner leading to early termination of the experiment). This left  $n = 34$  total (19 males, mean age:  $23.3 \pm 3.4$  years). Participants reported no history of psychiatric or neurological disorders, and gave informed consent prior to scanning. The study was approved by the ethics committee of the University of Granada. Participants' base compensation was 35 Euros, plus a performance-based bonus for an average payment of  $40.93 \pm 2.57$  Euros. Participants were given a voluntary anonymous debrief concerning their insight into the test\_long session, which we display in Supplementary Table 1.

### *Stimulus and task*

Stimuli were novel objects drawn from the NOUN database [28]. Out of the 60 possible images in this database, objects that were rated as most similar to the others (e.g. a similarity rating within 1 standard deviation of the maximum) and objects that were rated as most familiar (e.g. less than 50% for inverse familiarity score) were excluded, resulting in 41 possible objects. For each participant, 12 of these 41 objects were randomly selected for use throughout the study. Selected objects were arbitrarily assigned a rank from 1-12, with ranks 1-6 belonging to context A and 7-12 to context B. We denote these  $i_1 - i_{12}$  in the text.

Before entering the scanner, participants performed a computerised training phase which we call train\_short. This training phase consisted of between 3 and 10 blocks of 120 trials. On each block, objects were sampled from a single context for 60 trials (A or B) and then the alternate context for another 60 trials. Each trial began with the presentation of two objects drawn from adjacent ranks within a single context (e.g.  $i_3$  and  $i_4$  or  $i_8$  and  $i_9$ ), which were shown either side of a central fixation point. Above the point the words "more brispy?" or "less brispy?" appeared in Spanish (i.e. "mas brispo?" or "menos brispo?"). These objects remained on screen for 5000 ms or until response, whichever was shorter. Participants were instructed to select

the corresponding object (i.e. that which was more or less brispy) using either the “F” (left object) or “J” (right object) keys. Once a response was recorded, a red or green box would appear around the selected object to indicate whether it was the correct selection, and this response feedback box persisted for 475 ms. If participants did not respond within 5000 ms, the trial was considered incorrect and was not repeated. After feedback there was a blank screen for a variable delay of up to 50 ms before the next trial. Critically, participants were only trained to compare 5 object pairs from each context, e.g.  $i_1 - i_2$ ,  $i_2 - i_3$ ,  $i_3 - i_4$ ,  $i_4 - i_5$ , and  $i_5 - i_6$ , from context A and  $i_7 - i_8$ ,  $i_8 - i_9$ ,  $i_9 - i_{10}$ ,  $i_{10} - i_{11}$ , and  $i_{11} - i_{12}$ , from context B. Whether participants were asked to select the more or less brispy object, and hemifield presentation of the objects, were randomised on each trial. Additionally, the trial-order of each object pair was randomly shuffled. Participants performed this task for at least 3 blocks, and until they reached a criterion of 90% correct on both contexts and correct responses for the final 12 comparisons of each context. One participant was excluded for failing to reach this criterion after 10 blocks (see **Fig. 1C**).

The format of the test phases test\_short and test\_long was identical (but different to train\_short). Test phases occurred in the scanner, and consisted of 288 trials in which lone objects were presented in a random sequence, with the constraint that each combination of 12 (current trial) x 12 (previous trial) ranked objects occurred exactly once in the first half (144 trials) and once in the second half (144 trials) of the test phase. Each object was presented centrally for 750 ms, after which participants had 2000 ms to respond whether it was more or less brispy than the previous object. The words “more” and “less” appeared randomly on the left and right of the screen, and the mapping from more/less to left/right buttons (held in either hand) switched midway through the test phase. After the response, there was a pseudorandomly jittered interval of 1500-5500 ms, and the fixation dot turned blue if a response was recorded within this deadline, while a red letter X appeared if the response was missed. Critically, participants did not receive trial-wise feedback and were instead were rewarded bonus points at the end of each block. These bonus points were proportional to their accuracy on that block and were translated into additional monetary reward at the end of the experiment.

The boundary training phase occurred between test\_short and test\_long. It was similar to train\_short except that it lasted just 20 trials, and the only items presented were objects ranked (arbitrarily) as 6 and 7. These could occur on either side of the screen, with “more” or “less” randomised over trials as in train\_short. Participants viewed the objects for 3000 ms after which a feedback screen stayed up for 1500 ms, be it a green or red bounding box, or a red X at fixation if no response was recorded. There was then a variable intertrial interval from 1400-5000 ms before the next trial.

Finally, after completing test\_long, participants remained in the scanner and performed a number localiser task, which was identical to test\_short / test\_long with the exception that objects were replaced with Arabic digits 1-12 and participants responded “more” or “less” according to whether each number was greater or less than the previous.

### *Idealised Behavioural Matrices*

We analyse behavioural data by plotting accuracies and RTs for each combination of 12 objects shown at test, and/or as a function of symbolic distance (i.e. the distance in rank between the current and previous item). We constructed idealised reaction time and choice matrices (**Fig. S4A**) under the assumption that choices were noiseless triangular matrices and that RTs depended linearly on symbolic distance. Specifically, our RT matrices were constructed by  $1/(1 + \text{dist}(v', v))$ , where  $v = [1:6 \ 1:6]$  for test\_short and  $[1:12]$  for test\_long, and  $v'$  it's transpose. Our accuracy matrices were created by setting the upper triangle of each quadrant (in test\_short) or the entire matrix (in test\_long) to 1 and the lower triangle to zero. Note that as participants did not compare objects to themselves, diagonal elements of our design matrices were excluded from analyses.

### *fMRI data acquisition*

MRI data were acquired on a 3T Siemen's scanner. T1 weighted structural images were recorded directly prior to the task using an MPRAGE sequence: 1x1x1 mm<sup>3</sup> voxel resolution, 176x256x256 grid, TR = 2530 ms, TE = 2.36 ms, TI = 1100ms. Each fMRI image contained 72 axial echo-planar images (EPI) acquired at a multiband acceleration factor of 4 in interleaved

sequence. Voxel resolution was 2 mm<sup>3</sup> isotropic, slice spacing of 1.6 mm, TR = 1355 ms, flip angle = 8, and TE of 32.4 ms. 560 EPI images were recorded for the localiser and 1220 EPI images for each of the experimental sessions. This resulted in 3000 EPI images per participant with a scanning time of about 100 min. Scans were realigned to the mean scan within each session. The anatomical scan was co-registered to the mean of all functional images. Anatomical scans were normalized to the standard MNI152 template brain. The functional EPI images were then normalized and smoothed with a full width half maximum Gaussian kernel of 8mm. Images were then downsampled by reslicing to 3 x 3 x 3 voxel mm<sup>3</sup> voxel resolution before performing analyses.

### *fMRI: Data analysis*

Scanning sessions were concatenated and constants included in the GLMs to identify runs and account for differences in mean activation and scanner drift. All GLMs used delta functions convolved with the canonical haemodynamic response function (HRF) and time-locked to trial events. We also included the 6 head motion parameters derived from pre-processing as nuisance regressors [translation in x, y, z; yaw, pitch, roll]. Automatic orthogonalization was switched off. Data were analysed with SPM12 and in-house scripts. All contrasts were constructed as simple t-contrasts with first-level t-maps as input. Unless otherwise noted, we only report clusters that fell below an FWE-corrected p value of 0.01 (as in [48]) with a setting of cluster extent to 10 voxels or more and a voxel-wise uncorrected threshold of  $p < 0.001$ . Data were visualized using the XjView toolbox (<http://www.alivelearn.net/xjview>).

We fit our data with 4 different general linear models (GLMs). The first GLM was used to define ROIs from the number localiser. The design matrix for GLM1 included parametric modulators time-locked to stimulus onset for each number, as well as 6 nuisance motion regressors. We considered clusters of voxels that passed a threshold of FWE  $p < 0.01$  in response to the stimulus regressor. Although several regions passed this threshold, we focussed on ROIs in dmPFC and PPC, chosen on the basis of previously stated predictions (we show searchlight results in addition to ROI analyses, which seem to justify this choice) [7]. The second and third GLMs were used to estimate neural patterns associated with each object within test\_short and test\_long. The design matrix for these models each included 12 regressors, one for each of the

objects locked to stimulus onset, as well as 6 additional nuisance regressors for head motion. In one case (GLM2) we estimated this regression separately for each block of 72 trials ( $n = 4$ ). This allowed us conduct analyses that required between-run crossvalidation (e.g. SVM analysis). In the other case (GLM3) we modelled all trials within test\_short or test\_long. This latter GLM was used for calculating RDMs in ROI and searchlight analyses of fMRI data. In a fourth GLM, we additionally included either 11 (test\_short) or 22 (test\_long) regressors coding for the distance from the current to previous image. Fits from GLM4 were used to generate data for multidimensional scaling visualization aids.

### *Representational Similarity Analysis*

BOLD RDMs were constructed by taking the correlation distance between voxel patterns elicited by each of the objects in test\_short and test\_long, yielding a 12 x 12 RDM. For searchlight analyses, we used a radius of 12mm. For each searchlight sphere or ROI, we computed the neural DMs from the condition-by-voxel matrix of estimated neural responses using Pearson correlation distance between pairs of conditions.

These were compared to model RDMs which were created from linear distances between item ranks within context (1-6 and 7-12;  $RDM_{mag}$ ), distances between ranks across contexts (1-12;  $RDM_{mag\_long}$ ) and between contexts themselves (i.e. 0 within context, 1 between context). All model RDMs were standardised and comparisons to neural data were conducted with tests of correlation (Pearson's  $r$ ), or regression. The additional RDM reported here ( $RDM_{NN}$ ) was obtained by taking the Euclidean distance between the 12 hidden-layer activations elicited by probing the network with one-hot inputs corresponding to  $i_1 - i_{12}$ . Z-scored neural RDMs were regressed, or correlated, with z-scored model RDMs. All statistics reported for RSA analyses were obtained by evaluating RDMs at the single subject level and conducting group-level (random effects) inference on the resulting coefficients, using FWE correction where appropriate.

To visualise neural state spaces, we used multidimensional scaling with metric stress (equivalent to plotting the first principal components of the data) in two dimensions, using GLM4 (see above).

### *Support Vector Machine Decoding*

All classification analyses utilised a multiclass support vector machine model. GLM2 utilised 4 beta values for each object (one for each run), and so we trained binary SVM classifiers on data from objects in context 1, and tested the model on objects in context 2. The classifier used a “one versus one” coding design, meaning that each learner  $l$  was trained on observations in 2 classes, treating one as the positive class and the other as the negative class and ignoring the rest. To exhaust all combinations of class-pair assignments, we fit  $K * \frac{k-1}{2}$  binary SVM models, where  $k$  are the unique classes (ranks 1-6 here). Specifically, let  $M$  be the coding design matrix with elements  $m_{kl}$ , and  $s_l$  be the predicted classification score for the positive class of learner  $l$  (without loss of generality). The algorithm assigns a new observation (from context 2) to the class  $\hat{k}$  that minimizes the aggregate loss for the  $L$  binary learners.

$$\hat{k} = \underset{k}{\operatorname{argmin}} \frac{\sum_{l=1}^L |m_{kl}| g(m_{kl}, s_l)}{\sum_{l=1}^L |m_{kl}|}$$

Each of these binary learners used a linear kernel function.

### *Brain Behaviour Correlations*

We performed a correlation analysis to quantify the extent to which the elongation of neural representations predicted integrated behavioural responses. We analysed human choice patterns by computing idealised choice matrices (described above) and inputting both the test\_short and test\_long patterns into a competitive regression model. The degree of behavioural integration was defined as the relative fit of each of these matrices. Similarly, we constructed neural model RDMs describing the ground truth symbolic distance between each pair of item in test\_short and test\_long (see above). We then defined the degree of neural elongation as the relative fit to each of these RDMs in a competitive regression model. We then tested at the group level the extent to which the degree of neural elongation predicted the degree of behavioural integration using Pearson’s correlation.

## Neural Network Simulations

We implemented a two-layer feedforward neural network with coupled input weights to study the computational underpinnings of the task, its solutions and possible failure modes. All simulations were run for  $n = 20$  random seeds and plots show averages across seeds. The network received two one-hot vectors, coding respectively for the object on the left ( $x_a$ ) and right side ( $x_b$ ) of the screen (a one-hot vector for object  $i$  has zeros everywhere except at the  $i$ -th position which is equal to one). The one-hot vectors were then propagated forward by the coupled weights  $W_1$  and  $-W_1$  respectively, followed by a rectified linear unit ( $ReLU$ ) to create the hidden layer representation of 20 neurons. Finally, the hidden layer representation was projected onto a single output value by the readout weights  $w_2$ :

$$\hat{y} = w_2 ReLU(W_1 x_a - W_1 x_b)$$

By coupling the input weights we ensured that the hidden layer representation of each object was independent from the position on the screen. Note that due to objects being represented as one-hot vectors, hidden representations of objects are independent from each other, i.e. the  $i$ -th column of the weight matrix  $W_1$ . Further, due to the symmetry in the first-layer weights, if the two one-hot vectors encode the same object the network's output is zero.

The network was optimised using stochastic online gradient descent

$$\Delta W = -\eta \frac{\partial \mathcal{L}}{\partial W}$$

on single pairs of objects, i.e. a batch size of 1, with learning rate  $\eta = 0.05$  on the mean squared error between the network's output  $\hat{y}$  and the target values  $y = 1$  for  $i_a > i_b$  and otherwise  $y = -1$ :

$$\mathcal{L} = \frac{1}{2}(\hat{y} - y)^2$$



Since inputs to the network were two one-hot vectors, in each training step only two columns of the first layer weight matrix  $W_1$  were updated, we denote these two column vectors by  $\Delta w_{1a}$  and  $\Delta w_{1b}$ .

Synaptic weights were initialised from a zero-centered Gaussian distribution with standard deviation  $\sigma = g * \sqrt{1/fan\_in}$  where  $g = 0.025$  and  $g = 1$  in hidden and readout layers respectively. The hidden layer weights were initialised to small values to encourage a low-dimensional (“rich”) solution [32]. We employed a training procedure very similar to that used for human subjects. Networks were first trained for 8 cycles, where each cycle was comprised of 120 trials (60 per context) - leading to a total of 960 steps of gradient descent training. Subsequently, we performed 20 training steps on the two objects of the boundary condition.

### *Learning relational certainty*

In order to recover the rapid *knowledge assembly* observed in humans, we adapted vanilla SGD, by applying mutual updates on synaptic weights  $W_1$  based on the pairwise certainty that two object representations bear an accurate relation to one another in embedding space, and in addition, correcting for potential drift in the readout weights  $w_2$ . For a given trial  $t$  with inputs  $x_{a,t}$  and  $x_{b,t}$  we compute the certainty value as a sigmoidal function of the loss incurred  $\mathcal{L}_t$ , with the slope  $\alpha$  and the bias  $\beta$  of the sigmoid as potentially free parameters (here we set them to  $\alpha = 1000$  and  $\beta = 0.01$ )

$$\Phi(\mathcal{L}_t) = \frac{1}{1 + \exp(\alpha(\mathcal{L}_t - \beta))}$$

Pairwise certainty values were then stored in the certainty matrix  $A$  as an exponential moving average

$$A_{ba}^{t+1} = A_{ab}^{t+1} = (1 - \gamma)A_{ab}^t + \gamma\Phi(\mathcal{L}_t)$$

where the free parameter  $\gamma$  determined how quickly old values were discounted.

In addition, to infer certainty values for pairs of items that were not presented to the network, a fraction of the certainty values for item  $i_b$  were added to the certainty values of  $i_a$ .

$$A_{a*}^{t+1} = A_{a*}^{t+1} = (1 - \gamma)A_{a*}^t + \gamma\Phi(\mathcal{L}_t)A_{b*}^t$$

and vice versa. Note that the certainty matrix is symmetric and therefore rows  $A_{a*}$  are identical to columns  $A_{*a}$ . These row-wise updates followed the heuristic: If item  $a$  is correctly related in embedding space to item  $c$  and item  $a$  is correctly related to item  $b$ , then infer that item  $b$  is also correctly related to item  $c$ . Synaptic weights were then mutually updated by outer products:

$$W_1^{t+1} = W_1^t + \Delta w_{1a}(A_{a*}^{t+1}c_a)^T + \Delta w_{1b}(A_{b*}^{t+1}c_b)^T$$

where  $A_{a*}$  denotes the  $a^{\text{th}}$  column of the certainty matrix. Note that  $c_a$  and  $c_b$  are vectors of scaling factors to correct for drift in the readout weights as follows:

$$c_a = \frac{\Delta w_{1a}^T w_2 + \Delta w_2^T (w_{1a} + \Delta w_{1a}) - W_1^T \Delta w_2}{\Delta w_{1a}^T (w_2 + \Delta w_2)},$$

In order to perform a SGD step on the items currently presented to the network (i.e. the  $a$ -th and  $b$ -th column of  $W_1$ ) the  $a$ -th and  $b$ -th entry of  $A_{a*}$ ,  $c_a$  and  $A_{b*}$ ,  $c_b$  respectively are set to 1.

### *Fitting Human Choice Matrices*

To fit human choice matrices we applied a sigmoid function to the linear neural network output

$$\sigma(\hat{y}) = \frac{1}{1 + \exp(-s\hat{y})}$$

We fit different parameterisations separately to choice matrices for high and low performers (defined by a median split, as in **Fig. 4**). For each, we performed a grid search on combinations of  $\gamma$  in range 0 to 1 and  $s$  in range 0.01 and 100 (both in  $\log_{10}$  units) and mapped the resulting deviation between predicted and observed choice matrices for that participant group (**Fig. S7B**). Because neural network models are stochastic, we repeated the simulations for 20 random initial seeds and averaged the resulting deviance for fitting. Low performers were fit

well with  $s \approx 1$  and had a U-shaped relationship with accuracy for varying  $\gamma$ , leading to two local minima, such that values that were close to zero (vanilla SGD) and close to one both resulted in a failure to stitch information appropriately (**Fig. S7B**). For low  $\gamma$ , the algorithm fails to acquire certainty and thus does not perform mutual updates, behaving like vanilla SGD. Similarly, for large  $\gamma$ , the certainty matrix is rapidly updated, such that the boundary items form a high certainty cluster separate from the rest of the items (**Fig. S7C**). In this case, after few mutual update steps that partly disentangle the representations, the certainty matrix rapidly approaches zero for non-boundary items, again leading to SGD-like updates on boundary items only. Behaviourally, these two failure modes can be interpreted as either failing to relate items in the two conditions during after boundary training for low  $\gamma$  or by relating the items of the boundary condition as independent group during train\_short for large  $\gamma$ . On the other hand, high performers had a single minimum for  $s > 2$  and  $\gamma \approx 0.1$  (**Fig. S7B**).
